# Supplementary material
Source: publisher site journal article supplement (https://www.dovepress.com/article/407543)
Supplement: Supplementary file 1 [file get_supplementary_file.php]

**Suppl. Table.** Bias assessment performed through the five-point Oxford Quality Scale.

| **Study** | **Oxford Quality Scale Score** |
| --- | --- |
| Lemos et al, 20089 | 3 |
| Kaur et al 201810 | 1 |
| Agarwal et al 202011 | 1 |
| Cheshire, 200212 | - |
| Solaro et al, 200013 | - |
| Rustagi et al, 201414 | 3 |
| Obermann et al, 200815 | - |
| Perez et al, 200916,17 | - |
| Hamasaki et al, 201818 | - |
